# Supplementary material for: Deep Clustering in Radar Subglacial Reflector Reveals New Subglacial Lakes
Source: Copernicus journal article supplement (doi:10.5194/tc-2023-62), 2023-06-07
Supplement: Supplementary file [file tc-2023-62-RC1-supplement.pdf]

# Review of, “Deep Clustering in Radar Subglacial Reflector Reveals New Subglacial Lakes”, by Sheng Dong et al., 2023

Review by Michael Wolovick

## Overview

In this manuscript, the authors apply Deep Learning (DL) techniques to the problem of identifying subglacial lakes using ice-penetrating radar data. They use a multi-step method consisting of first encoding the information contained in the shape of each vertical reflector trace into a lower-dimensional latent space, and then applying a clustering algorithm to that space in order to identify populations with similar trace shapes. Of these clusters, they identify the one with a narrow symmetric peak in reflection power as representing subglacial lakes, and they further refine the population of subglacial lakes by performing a simple linear attenuation correction to the bed reflection power. Thus, their final identification procedure can be viewed as containing two parts: one part, the encoding-clustering analysis, focuses on the shape of the reflector trace, looking for reflections that are narrow and symmetric, as would be expected for a specular interface. The second, the attenuation analysis, focuses on the strength of the reflector rather than the shape. The authors apply their method to the AGAP-S dataset from East Antarctica and compare their identified lakes with previously published lake compilations.

This manuscript is appropriate for publication in *The Cryosphere*. It represents a new method in the analysis of ice-penetrating radar data with machine learning techniques and a new method for the identification of subglacial water. However, before it can be accepted in final form, I think that the authors need to provide more justification and explanation around their choice to use a clustering algorithm and on their choice of a particular number of clusters to use in that algorithm. In the remainder of my review, I first explain my major concern about the clustering algorithm, and then I give detailed comments on the rest of the paper.

## Major Concern

My biggest concern with the analysis in this paper is the decision to use a clustering algorithm, which splits the data into discrete non-overlapping clusters, and the arbitrary decision to use 15 clusters. The data presented in Figure 3a do not appear to display any inherent clustering on their own. Rather, the data points appear to vary continuously across the Z1,Z2 plane. This point is confirmed by the author’s own elbow curve (supplemental figure 1), which does not display a clear cutoff, and this point is acknowledged by the authors themselves on lines 166-168. Thus, a mode of analysis that breaks the data up into discrete categories may not be appropriate, and the authors’ decision to use 15 categories is arbitrary and unsupported.

Nonetheless, subsequent steps in the analysis protocol are dependent on the use of a clustering analysis earlier on. The ultimate end state of the analysis- a list of positively identified water bodies- requires that the data be split into discrete categories at *some* point. At some point a threshold must be applied to distinguish “water” from “not water”, and if the clustering analysis is not used for this purpose, then some other means of setting a threshold must be

used. Additionally, if I have interpreted the authors' reflection power analysis correctly, then the clustering analysis may also be needed at this stage as well, since I think that they are averaging reflection power values within contiguous reflectors identified through cluster analysis before analyzing reflection power (but note that their explanation of this part of the method was somewhat unclear, so I am not 100% confident that I have interpreted their procedure correctly; I discuss the need for more clarity around this method in the Detailed Comments section below). Averaging reflection power within contiguous similar reflectors is a reasonable methodological choice, since reflection power can be quite variable along-track. Basically, the authors are using the clustering analysis to identify contiguous regions along the bed that have basically the same reflection trace, and they are defining each of those regions as "one reflector" with a single average reflection power for the purpose of reflection power analysis.

Thus, I face a dilemma: on the one hand, I do not want to recommend that the authors remove the cluster analysis entirely, since doing so may necessitate downstream changes throughout their method, including changes to parts of the method that seem sensible; but on the other hand, the data do not seem to support the use of discrete clusters and the particular choice of 15 clusters is unsupported. The arbitrary decision to use 15 total clusters can be regarded as an indirect means of setting the threshold separating "water" from "not water", since the size of each cluster varies inversely with the total number of clusters. A low total number of clusters will increase the size of each individual cluster, thus increasing the diversity of reflectors in the "water" cluster, while a high total number of clusters will make the "water" cluster smaller. The authors state on line 168 that they have tested different values of K (the total number of clusters), but they do not show the results of those tests in the manuscript.

Therefore, as a minimum condition for publication, I think that the authors should show the results of some of these sensitivity tests. How does the final population of water bodies depend on the choice of K? What percentage of the identified water bodies are robust to the choice of K? Perhaps the subpopulation of water bodies that emerge for multiple values of K could be considered a more robust identification of subglacial lakes. (As an aside, if some values of K result in the clustering algorithm splitting the upper right "water corner" of Z1,Z2 space into two clusters, then that would be a valid argument for omitting those values of K; the K sensitivity test should only include values of K for which there is one unambiguous "water cluster"). Alternatively, if the authors can provide argumentation to justify their particular choice of K=15, then that could also satisfy my concerns, although the authors' own statement on lines 166-168 seems to indicate that they do not believe a particular value of K is supported by the data. It may also be worth plotting the elbow diagram (supplemental figure 1) on log/log axes to see if a corner emerges when the data are plotted in that fashion. Once the authors have either justified their particular choice of K, explored the sensitivity of their results to K, or both, then I think that this manuscript will make an excellent addition to *The Cryosphere*.

## Detailed Comments

L14

Some of these references aren't really appropriate to use as a general background on subglacial water. Robin 1970 is about ice-penetrating radar, Siegert 2000 is about subglacial

lakes, and Pattyn 2010 is about the results of a specific model. Pattyn and Siegert could work, although they aren't necessarily the best citations for this purpose, but Robin 1970 is definitely the wrong reference to use here. Chapters 6 and 9 of (Cuffey and Paterson, 2010) could be cited here, although I understand that citing a textbook is a bit unsatisfying. Another important reference might be (Robin, 1955).

L21 "...in recent years..."

I don't know if it is fair to describe the use of ice-penetrating radar for detecting the subsurface features of ice sheets as "recent". Maybe this sentence would be better as, "Ice-penetrating radar can be used to detect the subsurface features of ice sheets". Also, this would be a good place for the Robin (1970) reference, not L14. Another good reference might be (Robin et al., 1969) or (Bailey et al., 1964).

L50: "from the CReSIS"

Should be "from CReSIS".

L52: "We then apply K-means clustering method"

This sentence should be reworded in one of the following 3 ways: 1) "We then apply the K-means clustering method", 2) "We then apply a K-means clustering method", or 3) "We then apply K-means clustering methods". Wording (1) applies if there is only 1 version of the K-means clustering method, wording (2) applies if there are multiple versions of the method but you only use 1 of them, and wording 3) applies if you use multiple versions of the method.

L54: "We notice a cluster"

"We identify a cluster" sounds better.

L61: "...to detect and label the other clusters..."

"The" is unnecessary here.

L72: "The radar images also contain the positions of ice bottom reflectors, which were extracted by hybrid manual-automatic method (Wolovick et al., 2013)."

Note that the bed picks produced by (Wolovick et al., 2013) are not the same bed picks included in the CReSIS data release. The AGAP-S data was processed in parallel at both the Lamont-Doherty Earth Observatory (LDEO) and CReSIS. The results of the LDEO processing are available at: <https://pgg.ldeo.columbia.edu/data/agap-gambit>. Though the original raw data is the same for both institutions, the code for SAR migration and bed picking was different, and of course different human operators provided the "manual" part of the manual-automatic bed picking. Both institutions used "hybrid manual-automatic" bed picking, but it might be better to cite a CReSIS source here if you are using the CReSIS version of the data.

L81: "Second, we apply the reflector position markers in the dataset to truncate the 1-D data within the  $\pm 200$  sampling points near the reflector position for every single trace along Z-axis."

It might clarify things a bit to say that the reflector in this case is the bed. So maybe, “Second, we use the bed picks in the dataset to truncate the 1-D data within  $\pm 200$  sampling points near the bed reflector position for every single vertical trace.”

L88: Gaussian filter, normalization.

What is the filter width? How are the data normalized?

L91: “1488600 1-D Z-axis (A-Scope) radar echo traces.”

Were you using the original 1.3 m along-track spacing of the data, or are you working with data that have been downsampled? I did not work with the CReSIS version of the AGAP-S data, but I know that other CReSIS data products are generally released at coarser horizontal resolution than this, and when processing the AGAP-S at LDEO, I downsampled the data by a factor of 10 in the along-track dimension. The original 1.3 m data should have a lot more than 1.4 million traces. If you are using downsampled data, then you should mention that.

L105-110: MSE

What does MSE stand for?

L132: “...are challenging to be reconstructed...”

Change to: “...are challenging to reconstruct...”

L166-168: “However, the elbow curve does not show a clear cutoff point, possibly due to the distribution of vectors in the latent space (Figure 3a) not displaying a distinct trend of multiple classes.”

The “elbow curve” for this method seems to be analogous to an L-curve for inverse problems. Could you please present the elbow curve on log-log axes in addition to the linear axes you used in your supplemental figure? The problem with linear axes for this purpose is that inverse power laws always appear L-shaped on linear axes, despite having no intrinsically preferable value.

Additionally, when I look at Figure 3a, it appears to my eye that the data do not really have any clusters at all. Is that what you meant by “not displaying a distinct trend of multiple classes”? To my eye, it looks like the data are smoothly distributed within the central part of the latent space, with perhaps a greater number of outliers in the negative direction for both Z1 and Z2 than in the positive direction. It sounds as though the lack of visual clustering in Fig 3a is confirmed by the lack of a clear cutoff in the elbow curve. I discuss this issue at greater length in my “Major Concern” section above.

Figure 3b

It might be easier to read and interpret this figure if you used a 10x10 grid of virtual waveforms instead of a 20x20 grid, and then made the individual waveforms twice as large. Additionally, it might be better to make the individual waveforms all black, and then overlay cluster boundaries as lines.

L185-192: Identifying subglacial water using clustering analysis

It seems as though your major reason for using clustering analysis was to get to this step, where you use your method to automatically identify water. The basic argument you are making here seems to be that the upper right quadrant of Z1,Z2 space contains symmetrical sharp reflectors, and these reflectors are more likely to be water. This argument is simple, robust, and I believe it. But in addition to identifying points in this quadrant using a clustering analysis with an arbitrary number of clusters, it may help to make your analysis more robust if you also constructed alternate metrics to identify points in this quadrant. For instance, you could select traces for which Z1 and Z2 are both more than 1sigma above the mean. Or you could make a combined water index,  $I=Z1+Z2$ , and then select points with a high value of this index. Alternatively, you could construct a not-water index by taking the euclidean distance from each point to the upper right corner (+2sigma,+2sigma). These sorts of continuous water indices may help reduce the dependence on an arbitrary choice of K.

L199: "Detected subglacial water bodies should contain a continuous ice bottom segmentation in subglacial water type with a width greater than 8 traces (corresponding to an average spatial distance of 10.4 m)."

You should double-check the along-track spacing of the data product you use. If the data have been downsampled from the original 1.3 m spacing, then your 8 trace threshold will correspond to a longer distance.

Figure 4c:

This plot would definitely benefit from a continuous approach to reflector categorization. The different colors here represent different categories, but it is hard to tell how close each category is to the water category. By contrast, a "water index" would provide a continuous metric that could be displayed here.

L204-218, Figure 5: Reflection power analysis

Did you correct the bed returned power for geometric spreading before doing this analysis? Signal loss with depth comes from both attenuation within the ice and from simple geometric spreading with range. The effect of geometric spreading can be calculated and removed.

Additionally, I am curious whether Figure 5 shows the entire dataset, or only a subsample of the dataset? When I did a similar analysis for the 2013 paper, I found many data points that were 3sigma or even 4sigma above the linear best-fit. However, in this figure it looks like you would have perhaps 2 or 3 data points at a 3sigma level, and no data points at a 4sigma level. Is the total sample size smaller here? What exactly is being plotted in Figure 5? Does each point represent a single trace, or does each point represent an along-track average of candidate water bodies? I feel like this method needs a better explanation.

After thinking about it for a bit, my guess is that you have done something like this:

- 1) Apply clustering analysis to the traces
- 2) Apply the 8-trace rule to generate contiguous reflectors that all belong to a particular cluster.
- 3) Compute average peak power for each contiguous reflector
- 4) Perform the attenuation analysis using this smaller dataset of horizontally averaged power data

Am I correct? Is that the procedure that you followed? If yes, then this should be explained in more clarity. In particular, it should be clear that you used grouped adjacent reflectors according to their cluster, and that you have done this for all clusters, not just the water cluster. If this is what you have done, then that also explains why you find far fewer high-reflectivity outliers than I did in the 2013 paper, since peak reflection power can be highly variable along-track and the averaging process will tend to reduce the amplitude of individual bright spots.

It also seems to me that the arbitrary choice to use 15 clusters will have a big impact at this stage, since it will determine the along-track length of contiguous regions that you average together into the analysis. It would be interesting to see in the sensitivity analysis how changing the value of K affects this part of the analysis.

Figures 4, 6, 7, 9, 10: Radar results figures

These figures would all benefit from being zoomed in on the bed. The vertical scale could be cropped between 2 km and 4km (or perhaps slightly below 4km, to accommodate the deep lake in Fig 9c). In addition, the color scale of the echograms should be adjusted so that the lower limit is just a bit below the noise floor and the upper limit is closer to the brightest bed. These changes would make it easier to follow along when the text goes into detail about specific features in these figures.

L260 "...but some are also sparsely detected."

This wording is awkward. Perhaps, "...but some isolated points are also detected."

Figure 8: map figure

It is hard to tell what the text labels (L#, E#, N#) refer to. Maybe you could move the text labels further away from their targets, and then add annotation arrows pointing from the text to the target?

Additionally, the main map should be bigger and the other elements of this figure should be smaller. There is way too much empty white space in this figure. The main map containing the central AGAP survey contains all of the important information in this figure. Therefore, that main map should be as big as possible. The other two items in the figure, the inset location map and the legend, can be placed in unused corners of the main map.

L255-268: L#, E#, N#

What do L, E, and N stand for? Are N1-N4 new subglacial lakes?

L 278: "Considering the dense distribution of subglacial water bodies nearby, these thicker reflection features are possibly formed by frozen-on ice due to ice flow."

Freeze-on isn't caused by ice flow. Freeze-on is caused by either conductive cooling or supercooling. Perhaps a better way to phrase this sentence would be, "Considering the dense distribution of subglacial water bodies nearby, these thicker reflection features are possibly formed by frozen-on ice that complicates the shape of the near-basal reflection trace."

L281: "...the sparse but regionally dense distribution..."

What exactly does “sparse but regionally dense” mean?

L309: “The unsupervised clustering analysis applied in the latent vectors relies on the implied feature difference of the reflection waveform, effectively excluding subjective and external factors in finding potential classifications of subglacial conditions, and reducing the dependence on model assumptions.”

Except for the subjective choice to use 15 clusters. This choice has downstream effects in terms of determining the size of the “water” cluster (because average cluster size should vary inversely with the number of clusters), so this arbitrary choice indirectly determines how much variability in reflector shape you are willing to tolerate while still calling something “water”. Additionally, the choice to use a 2D latent space instead of a higher dimensional space was also arbitrary. All methods require some degree of human choice on the part of the scientists employing the method.

It seems to me that the big advances achieved here are in 1) having a new method to quantify and classify the shape of the reflection waveform, and 2) using that method to help classify the physical setting of the ice sheet bed, particularly by helping to identify subglacial lakes. It is not really fair to say that you have excluded subjective and external factors, those factors simply enter into your analysis in a different way than they do in other analyses.

## References

- Bailey, J. T., Evans, S., and Robin, G. de Q.: Radio echo sounding of polar ice sheets, *Nature*, 204, 420–421, <https://doi.org/10.1038/204420a0>, 1964.
- Cuffey, K. M. and Paterson, W. S. B.: *The Physics of Glaciers*, 4th ed., Butterworth-Heinemann/Elsevier, Burlington, MA, 2010.
- Robin, G. D. Q., Evans, S., and Bailey, J. T.: Interpretation of radio echo sounding in polar ice sheets, *Philos. Trans. R. Soc. Lond. Math. Phys. Eng. Sci.*, 265, 437–505, <https://doi.org/10.1098/rsta.1969.0063>, 1969.
- Robin, G. de Q.: Ice movement and temperature distribution in glaciers and ice sheets, *J. Glaciol.*, 2, 523–532, 1955.
- Wolovick, M. J., Bell, R. E., Creyts, T. T., and Frearson, N.: Identification and control of subglacial water networks under Dome A, Antarctica, *J. Geophys. Res. Earth Surf.*, 118, 140–154, <https://doi.org/10.1029/2012JF002555>, 2013.
