# Supplementary material for: Deep Clustering in Radar Subglacial Reflector Reveals New Subglacial Lakes
Source: Copernicus journal article supplement (doi:10.5194/tc-2023-62), 2023-06-07
Supplement: Supplementary file [file tc-2023-62-RC2-supplement.pdf]

## **Review of “Deep Clustering in Radar Subglacial Reflector Reveals New Subglacial Lakes”, Sheng Dong et al., The Cryosphere Discussions, 2023.**

Veronica Tollenaar

### **General comments**

The paper discusses a subglacial lake detection method applied to a region near the center of the continent of Antarctica. With the available data, the problem can be seen as a positive and unlabeled problem, where some subglacial lakes have been outlined in earlier studies (positive labeled examples), while for the remaining area the presence or absence of subglacial lakes is unknown (unlabeled examples). The authors take an unsupervised learning approach to this problem, which is a valid choice.

The unsupervised learning consists of an auto-encoder, which basically reduces the dimensionality of the data, and a clustering, where one of the clusters is assumed to correspond to the presence of a subglacial lake. Although this approach is smart, novel, and has a high potential in delineating subglacial lakes, I see several weakly motivated choices in the methodology that I will also try to outline further through the specific comments per section.

My main issue is that the authors perform a clustering analysis on a (2-dimensionally) normally distributed set of samples. These samples are normally distributed through the applied loss function in the encoder. However, per definition, in this set of samples there is only a single cluster, otherwise the loss function should have allowed a certain number of gaussian distributions in the latent space. This caveat is also confirmed by the fact that there is no clear cutoff point in the elbow function to determine the number of clusters present in the data. In my view there are three potential approaches to adjust the manuscript to overcome these caveats in the methodology.

- (i) The authors can illustrate quantitatively that the results are convincing, despite the conceptual problem with the methodology, making the study a pragmatic approach toward subglacial lake detection. With the absence of correctly labeled negative examples (i.e., the absence of subglacial lakes), traditional performance metrics such as precision and accuracy cannot be estimated. Nevertheless, a sensitivity estimate of the results, which is currently not part of the manuscript, can be included.
- (ii) Instead of the clustering, the authors can identify where the currently known subglacial lakes are located in the latent space (i.e., plot these samples in Figure 3a). As “the distance between vectors in the latent space can serve as a statistical similarity indicator for reflector features” (Line 308-309), samples within a certain distance from the located latent-space vector of known subglacial lakes can be identified as subglacial lakes.
- (iii) The authors could use another approach to deep clustering as discussed in various deep learning literature. The simplest solution would be to use an auto-encoder instead of a variational auto-encoder, despite obtaining a less meaningful latent space in the sense that the distance between latent vectors does not reflect a similarity. Nevertheless, it might appear that there are distinct clusters in the latent space.

I think that through adopting (a combination of) the above approaches, or by taking another approach that overcomes the illustrated problem, the study can significantly contribute to the development of an automated approach for the detection of subglacial lakes. This method will be essential to process the ever-growing amounts of data across the continent (and beyond) efficiently, and the authors already convey this message clearly through an elaborate discussion of their results and informative figures.

## **Specific comments per section**

### **Title and abstract**

Title: I think “Subglacial Radar Reflectance” sounds better than “Radar Subglacial Reflector”. Also, apart from a very elaborate qualitative analysis of the results, there is no hard or independent evidence that the detected lakes are really lakes, let alone that they are “new”, which implies that they were not there before (in time). Leaving the word “new” out of the title solves this issue. Otherwise, rephrasing toward something like “An automated method for subglacial lake detection based on deep clustering” could be nice, but it depends on the intention of the authors.

Line 3: It is confusing to read that you generate a dataset. Maybe better to rephrase as “In this study, we use available IPR images in the Gamburtsev Subglacial Mountains to extract one-dimensional reflector waveform features of the ice-bedrock interface.”

Line 4: The method remains very mystical, maybe good to clarify that you apply a deep learning method to reduce the dimension of the data so that you can perform a cluster analysis.

### **1 Introduction**

Line 13: The sentence does not read well. I would suggest: “Subglacial water, i.e., water between bedrock and ice sheet, is formed through a complex interplay..”

Line 15: Potentially also include the recent publication of Kazmierczak et al. in *The Cryosphere*:

E. Kazmierczak, S. Sun, V. Coulon, F. Pattyn, Subglacial hydrology modulates basal sliding response of the Antarctic ice sheet to climate forcing. *The Cryosphere*, **16**, 4537–4552 (2022).

Line 16-20: The importance of research in subglacial lakes is well outlined, but the order is a bit confusing. I would start with the ice sheet meltwater (following the previous sentence about ice flow and dynamics), then the history of climate change and ice sheet evolution, then the subglacial lake sediments, then the unique lacustrine ecosystems.

Line 21: Potentially write out the acronym of radar (radio detection and ranging).

Line 21: Potentially remove “in recent years”, the next sentence refers to a publication of 1973.

Line 22: The sentence starting with “Subglacial water bodies” could fit better in the next paragraph, where these visual features are discussed again.

Line 23: I would swap around the subject and the object of these sentences so that it is easier for the reader to understand that here the authors are going to refer to other measurement techniques: “The thickness of the subglacial water layer and sediment characteristics at the bottom of lakes are also investigated with active seismic surveys (Paden et al., 2010; Arnold et al., 2020) and gravimetry and electromagnetic methods (Studinger et al, 2004, Key and Siegfried, 2017).”

Line 35: the “subjective factors” are not ruled out in this study: heavy postprocessing is applied and the results are discussed mainly in a qualitative way.

Line 36: the “absence of a complete interpretation of basal radar reflectance features” is also the case for the study: only a narrow window including the reflectance near the bedrock is considered, and the spatial context, i.e., along the bedrock, is only considered through a rather pragmatic postprocessing step that filters the results spatially. Deep learning is a powerful tool to consider these spatial relationships directly. If not adapting the methodology to actually rule out “subjective factors” and have a “complete interpretation of basal radar reflectance features”, I would suggest a more elaborate and precise discussion of other methods, to illustrate more in detail in which aspects the proposed methodology is better.

Line 37: I would suggest an easier rephrasing: “In recent years, deep learning has been applied as a powerful tool to detect different features in IPR images, including bedrock interfaces, internal ice layers, snow accumulation layers”. For the “radar semantic segmentation”, that is an automated feature extraction in se, so I’d suggest to either refer to what is semantically segmented or remove.

Line 40: I am not sure if I understand the difference between this sentence and the previous: is the previous specifically about the detection of layers? If not, I would try to combine this sentence with the previous one and specify the subglacial features. For me it is not clear whether the subglacial features refer to anything under the surface or just features at the ice-bedrock interface.

Line 42: I would rephrase this sentence with: “Moreover, deep learning applied to IPR has also contributed to estimates of ice thickness (to enable data application in ice sheet studies.)”, with the part in brackets potentially removed.

Line 46: Potentially include a reference to the dataset directly (see: <https://data.cresis.ku.edu/#ACRDU>)

Line 50: I think it is a bit confusing to use the wording “construct a dataset”, it suggests that you collected the data in the field. I suggest the rephrasing: “In this study, we select IPR images in the region of the Gamburtsev Subglacial Mountains from the CReSIS database. We crop these images around the ice bottom, to obtain a set of one-dimensional waveforms that capture the ice bottom reflectance characteristics. Using this data, we train ...”

Line 52: The “time-domain waveform features” are confusing. Either introduce the time-domain aspect in an additional sentence (something like: “The radar is reflected most strongly by the bedrock beneath the ice sheet, resulting in a peak in the return signal received by the radar over time. Moreover, bedrock characteristics, such as roughness or the presence of water, influence the intensity and shape of the peak signal, to which we refer to as the waveform features of basal reflectors.”)

Line 55: Do you mean the features that correspond to subglacial lakes?

Line 55: I would specify that this is a kind of post-processing step.

Line 58-60: What is the benefit of extracting reflectors with similar waveform characteristics as water bodies? How does that improve the efficiency and accuracy of the detection of subglacial lakes?

Line 61: Indeed, it is nice that you can characterize/cluster the subglacial features through this method.

## 2 Data and Methods

Figure 1: The Figure looks nice, and summarizes the workflow well, but there are several details that need to be adjusted: What is “Z-Scope”? What is “A-Scope”? “Ice Bottom” should be “Ice Bottom”, “Reconstructed Reflector Feature” should be “Reconstructed Reflector” (as in “Ice Bottom Radar Reflector”). Both waveforms need axes with labels (time and power I guess). For the caption “(b) VAE reconstructs and encoding of the sampled ice bottom reflector features.” should be changed to “(b) The VAE encodes and reconstructs the sampled ice bottom reflector.” For the subpanel (c), the caption says “Supervised”, while I think the authors mean “Unsupervised”.

Line 69: This sentence about the lake inventories seems out of place. I think, together with the sentence “According to the lakes inventory...” on line 71, these sentences should be moved to the introduction in the paragraph that starts on line 50, so that paragraph 2.1 really focusses on the radar data.

Line 70: I miss a reference here: is it this dataset that’s been used? <https://data.bas.ac.uk/full-record.php?id=GB/NERC/BAS/PDC/01544>

Line 74: “The radar data were acquired from L1B..” can be rephrased to “We use the L1B data product” to avoid confusion whether the data has been acquired by the authors.

Line 81: Is there a physical motivation for truncating the signal to this narrow range around the bedrock? When I see the radar images shown in the different Figures (e.g., Figure 4), I find it remarkable to see a distinct reflectance below the bedrock for each of the subglacial lakes that seems to be not captured anymore by choosing the narrow window.

Line 85: Assuming that the peak signal corresponds to a single point, I would guess the length of the truncated signal would be  $64 + 1 + 64 = 129$ , but it reads 128.

Line 88: Could you provide the bandwidth/sigma of the gaussian kernel?

Line 89: How do you perform this normalization? Somehow I get the impression that all of the nearly 1,5 million (incredible number, congrats!) reflectance traces are normalized individually: or do you calculate a global mean and standard deviation and set these to 0 and 1? If normalized individually, I think this might be the cause of why you need to use the post-processing step where you use the peak power reflectance. I would advise to either (i) normalize all data with the statistics of the entire dataset as otherwise you're comparing different units to each other, or (ii) already implement the depth/power relationship while normalizing, or (iii), more experimental, normalize each individual waveform, but provide the peak power and the ice thickness as additional input to the VAE.

Line 97: What do you mean with the sentence starting with "And the.."? I think it deviates the attention from why you use the VAE: to reduce the dimension of your data.

Line 102: I think you use it to reduce the dimension of the reflector waveform features from the ice bottom, right? It is confusing to think that the goal is to reconstruct something that you already know.

Line 104: Your bottleneck consists of a two-dimensional latent distribution, enforced to follow a normal distribution through using the KL divergence in your loss function. I find the motivation for choosing to sample only two samples from your latent distribution just for visual representation weak. Another motivation can be that it is easier to perform the clustering in two dimensions, or that in other work it has been proven sufficient (for example in the referenced work of Li 2022).

Line 106: Conceptually I don't understand why the KL is used in the loss function: it forces the latent space to be normally distributed, which is essential when using VAE for generative purposes. However, as the authors want to perform a cluster analysis, I think there is a fundamental conflict. Clustering data that is normally distributed will not yield in clearly separable clusters. Or, differently put: the underlying assumption for clustering should be that there are different clusters, which, of course, can be each normally distributed, but through VAE the latent space is constructed as one single big cluster. The fact that there is no clear cutoff point of the elbow curve that the authors want to use to determine the number of clusters confirms that there are no separable clusters in the latent space. I have not read enough into the literature to know whether there are other examples of the approach that the authors take that still yield useful results – but a quick search indicated that there are fancy solutions for this mismatching of concepts, e.g., Lim et al., 2020. A simple solution would be to just use an Auto Encoder and perform the clustering on those results.

Lim, Kart-Leong, Xudong Jiang, and Chenyu Yi, Deep clustering with variational autoencoder. *IEEE Signal Processing Letters*, **27**, 231-235 (2020).

Line 122: Why do you stop training at epoch 10 if the training loss does not descend more after epoch 4? Can you report the generalization error? If the training loss does not decrease, but you continue training (epoch 5-10), you start to overfit to your training data.

Line 123: The word "evaluate" suggests a quantitative estimation, for example based on independent test data. Could you either provide this, or change to "illustrate"?

Figure 2: Could you provide axes and labels for all subpanels? Could you provide the MSE for all examples? Potentially the learning curve, and the generalization error could be included in this Figure.

Line 139: These vectors consist of two samples from the latent distribution, right?

Line 143: How does this subset vary from the validation subset mentioned in line 119? It seems like you are going to use these samples for clustering and not for “validate the encoder”?

Line 147: That gaussian distribution poses problems for the clustering (see earlier remark about line 106).

Line 148-153: This is almost philosophical, could you rephrase it with more direct wording?

Line 156: I do not directly see that 2000 reflectors are sufficient for clustering. From Figure 3, to me, the clusters seem rather arbitrary. Also, given that you have 1.5 million reflectors and you perform the dimension reduction to enable efficient clustering, I think the sample of 2000 is rather small (~0.1 % of all data). How long does it take to perform the clustering analysis?

Figure 3: The generative capacity of VAE is nice, and Figure 3b is a pretty visualization of this capacity. However, I do miss a link to the physical phenomenon, and therefore I would suggest to remove the subfigure or move it to Supplementary Materials.

Line 169: Here I miss evidence for the statement: what motivates the authors to conclude that there is an effective separation of bottom reflector features? And how do they correspond to different conditions?

Line 171-183: Similar to Figure 3b: a physical interpretation is lacking, and I would move this to Supplementary Materials.

Line 184: In this section the authors discuss how to detect subglacial lakes using the results of the clustering analysis. The main points discussed are related to post-processing steps, and I think this is not clearly reflected in the section title. Potential other titles could be “Subglacial lake detection” or “Post processing to detect subglacial lakes”.

Line 192: I do not understand the conclusion here. I guess you want to say that one of the clusters seems to correspond to subglacial lakes, right? Another way to confirm this is to give statistics of to what clusters the waveforms at earlier detected subglacial lakes belong, e.g., 80% of known subglacial lakes have a bottom reflector that falls into cluster x.

Line 198: What do you mean by “based on experimental experience”? Is there a reference? A solution could be to remove that specification.

Line 203: What do you mean by “interpolation artifacts due to specific noise?”

Line 209: If I understood it well, before you used this peak echo power to normalize the data for the encoder. I wonder if this postprocessing step would still be necessary if don't apply this normalization earlier. That would potentially be something to investigate and report on.

Figure 4: For panel d, would it be possible to have the same colors as panel c? So black for the lake, and other colors corresponding to the different clusters that have been filtered out during the post processing?

Line 211: How did you calculate the best linear fit? Somehow, I get the impression that the orange dashed line should be steeper in Figure 5, but this might be an optical illusion.

Figure 5: Potentially only show the +1 sigma as that's the threshold you use, to avoid confusion.

### **3 Results**

Line 229-230: If I understand it correct you are claiming that the results are reliable because the subglacial water bodies look like known subglacial waterbodies, right? Out of interest, what do you mean by the geothermal environment in adjacent areas?

Line 237-240: This statement is very similar to the statement in the previous paragraph. I think you do not need to convince the reader of the value of an automated method for detection, it is already clear that this is very valuable.

Line 241: I think it should be "(at about 40 km along the transect)" or so, it looks like the lake is ~3 km wide.

Line 241-253: Nice discussion of results.

Line 255-260: Somehow this paragraph makes me doubt that for the results in Figures 4, 6, and 7, the peak power post-processing step is not applied? Could you clarify that in the text?

Line 260: By "sparsely detected", do you mean that these are isolated lakes? Or just along a single IPR line?

Line 261: Normally it should be "compare to something": rephrase as "We compare the subglacial lakes detected in this study to the previously identified ..."

Line 265: remove "which is newly detected", that is already clear from the first part of the sentence.

Line 277: Do you mean that the red arrows show lakes that have not been detected?

Line 278: In Figure 7c you associate the yellow cluster with frozen-on ice and ice flow dynamics. But in Figure 9 it looks like different shades of purple. Do you think multiple clusters do show this frozen-on ice? And are these clusters next to each other (it's hard to link the shades of purple in the Figures with the shades of purple in Figure 3a).

Line 280: I think the origin of the water bodies is very suggestive. What do you mean by the sparse but regionally dense distribution of subglacial water bodies?

Figure 8: I think the Figure is very essential for the study. It took a long time to understand the link between the regions and the labels, but I understand now that it is related to the thin black arrows. Potentially it would be nice to clarify that in the main text, as well as in the caption. Moreover, the two blue colors (blue and cyan), might be confusing, and the labelling can be “detected lakes (no post-processing)” and “lakes (post-processed)” or so, now it is not clear what is what exactly. Other questions that pop up when seeing the figure are: (i) in the region near “N3”, going perpendicular to the radar lines, there is a clear line of lakes, does that correspond to a kind of channel in the subsurface topography? It could be interesting to overlay the detections on bed topography data, but that is probably out of scope for this study. (ii) There are a lot of “candidate lakes” on the southern part of the survey, it almost looks like an artifact, is that the case?

Line 287: What do you mean by “differ visually”?

Line 298-304: I think the conclusion is very bold, basically saying that the previous inventories are wrong in places where the authors do not detect lakes. I would be a bit more reserved and steer in the direction that this automated method is promising, and that further investigation is needed (as already suggested). Moreover, there is the remark about “multi-trace detection methods”, but in some sense the applied post-processing of grouping 8 neighboring traces makes this method also a “multi-trace detection method”, right? Or is this not applied for obtaining the map?

## 4 Discussion

Line 307: I understand what you mean by “all reflection information”, but actually you crop the reflectance to contain only the signal of the bottom.

Line 308: I miss a sentence that states what has been done, something like “We encoded the waveforms to obtain two-dimensional vectors that conceptually summarize the waveform in the so-called latent space of an auto-encoder. The distance between vectors in the latent space...”

Line 328: What do you mean by this sentence? The clustering analysis can be used as input for other models?

Line 330: What do you mean by “an automated analysis data”? “automated analysis of the data”?

Line 336: “As such, the method has potential..”

Line 337: What do you mean by classifications for single-track radar data?

Line 339: Sorry for the noob question: does ice penetrating radar on Mars exist? Can you obtain those kinds of observations from space? And in general, DL methods are known to perform badly on out-of-distribution examples, so is it realistic to apply the method to data that is very dissimilar from airborne observations?

## 5 Conclusions



Concise, clear

### **Data availability**

Will you share your clustered data, i.e., the data in Figure 4, 6-10? Will you share your code in a repository?

### **Technical comments**

Line 21: introduce the acronym IPR here

Line 21: “subsurface features”

Line 37: remove (DL), acronym is not used often in the paper, and it complicates reading.

Line 42: “These deep learning-based approaches”

Line 66: remove “reduction”, add “the” before variational auto=encoder

Line 116: “n” instead of “N”

Line 149: Brackets around Kingma and Welling 2013

Line 185: “different type’s ice bottom” should be “different types of ice bottom”

Caption Figure 4: “Fist example” instead of “Example 1”

Caption Figure 4: “Results of the unsupervised clustering of the latent vectors”

Line 220: “dataset” instead of “database”

Line 243: Remove “This subglacial ... return power”, it repeats the previous sentence

Caption Figure 7: “continuous” instead of “continus”

Line 270: “Figure” instead of “Figures”

Line 335: “covering the Arctic” can be “covering, e.g., the Arctic”

Line 356: remove “A.”
