# Supplementary figures and images for: Deep Clustering in Radar Subglacial Reflector Reveals New Subglacial Lakes
Source: Copernicus journal article supplement (doi:10.5194/tc-2023-62), 2023-06-07

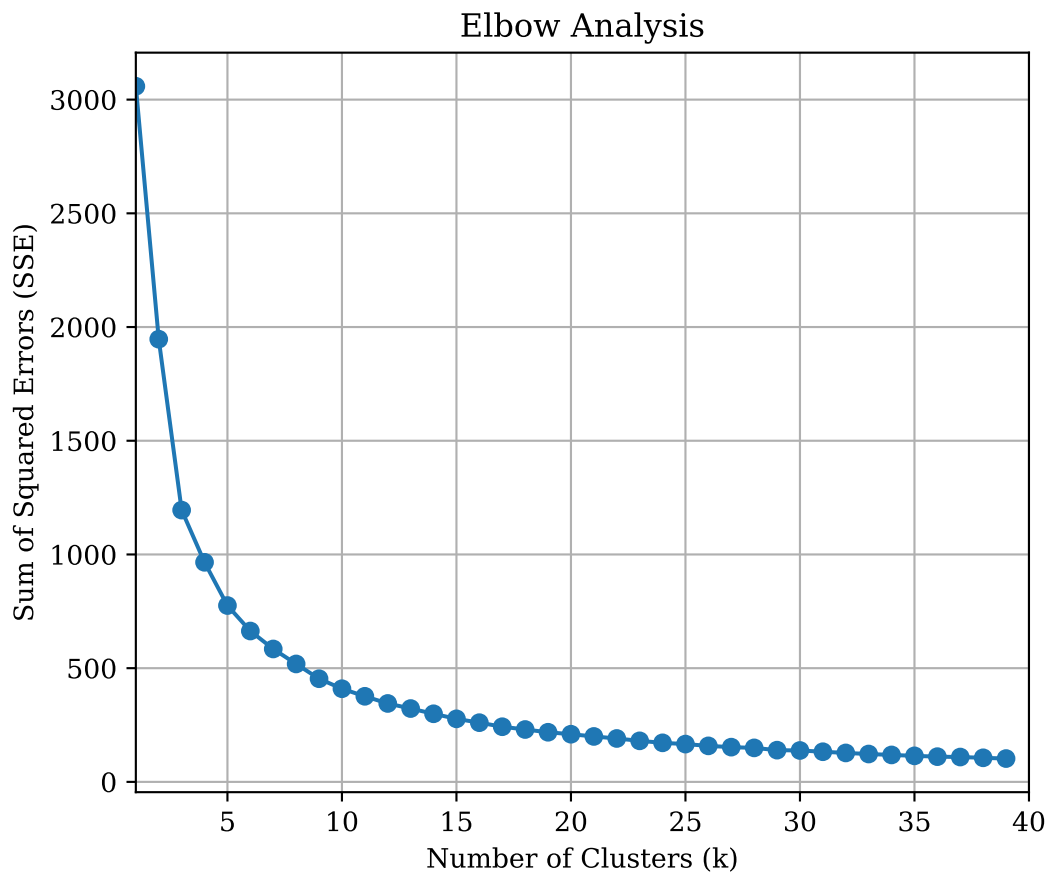

**Figure S1.** Elbow analysis using different cluster numbers (K) in the K-means algorithm.

Supplement: Supplementary file 1 [file tc-2023-62-supplement.pdf]
